# Supplementary material for: Dissemination and diffusion of research to address the opioid crisis in justice settings: a Justice Community Opioid Innovation Network (JCOIN) case study
Source: Research Square preprint supplement (doi:10.21203/rs.3.rs-7652402/v1), 2025-10-17
Supplement: Supplementary file 2 [file 992827c64cce287ccacf5c2b.docx]

#

# **Additional file 1: Interview Guide**

#

# **Aims and Objectives**

To investigate the priorities, challenges and barriers related to the treatment for OUD, as well as preferred formats for receiving science translation and content.

#

# **Q1. Organizational Background**

- Can you tell me about your organization, its mission, members and services?

**Q2. Organizational Reach**

- What is the reach of your organization?
- Can you share any details about conferences or annual meetings, events that you hold?

**Q3. Communication Channels**

- What are the communication channels you utilize to communicate with your members and community? Podcasts, Twitter, Linkedin, Instagram, Facebook, Youtube, Newsletters, etc?
- Are there any special projects or Initiatives related to addiction or substance use disorders you’d like to share?

#

# **Q4 Barriers and Challenges**

- What are the barriers and challenges in addressing addiction that your organization encounters?
- [Ask for more details, follow-up questions]

#

# **Q5. Communications Preferences**

- What are the preferred product formats and social media channels for receiving new research findings and data from JCOIN?

Product Formats

1. Blog Post/Newsletter Feature customized for your organization
2. Infographic
3. Video Explainer
4. Plain Language Summary – Research Short Summary (1-2 pages)
5. Social Media Toolkit
6. Podcast
7. Implementation Toolkit
8. Policymaker Summary – Issues Brief (2-3 pages)
9. Slide deck/PowerPoint Presentation
10. Online Training/eCourse
11. White paper (8-10 pages)

Social Media Channels

1. Facebook
2. Twitter
3. LinkedIn
4. Instagram
5. YouTube

#

# **How to use this Guide**

The following instructions are designed to help research assistants effectively conduct semi-structured interviews using the provided interview guide. These guidelines ensure consistency, professionalism, and data quality while allowing flexibility to adapt to the flow of the conversation.

**1. Familiarize Yourself with the Interview Guide**

- Review the interview guide thoroughly before conducting any interviews. Understand the purpose of each question and the overall goals of the study.
- Take note of the structure: main questions, potential follow-up questions, and key themes to explore.

**2. Prepare for the Interview**

- Environment: Ensure the interview setting is quiet, private, and free from distractions.
- Equipment: Check recording devices, notetaking materials, and any other tools you will use.
- Consent: Bring all necessary consent forms and be prepared to explain the consent process.

**3. Establish Rapport**

- Begin with a warm introduction, thanking the participant for their time.
- Briefly explain the purpose of the interview and reassure them that their responses will be confidential.
- Create a comfortable environment by using a friendly tone and maintaining eye contact (if in person or video).

**4. Follow the Guide, but Stay Flexible**

- Use the interview guide as a roadmap to cover key topics.
- Ask questions in the order that feels natural based on the flow of the conversation.
- If a participant’s response introduces new, relevant themes, explore these further without losing sight of the study’s main objectives.

**5. Use Active Listening Skills**

- Show genuine interest in the participant’s responses by nodding, maintaining an engaged posture, and providing verbal affirmations (e.g., “I see,” or “That’s interesting”).
- Avoid interrupting the participant unless they stray significantly from the topic.

**6. Probing and Clarifying**

- Use follow-up questions or prompts to encourage deeper responses (e.g., “Can you tell me more about that?” or “What do you mean by [specific term]?”).
- If a response is unclear, politely ask for clarification.

**7. Keep Track of Time**

- Be mindful of the allotted time for the interview. Ensure all key questions are covered while allowing the participant to elaborate on their answers.

**8. Conclude the Interview**

- Summarize key points to confirm your understanding of their responses.
- Ask if they have any additional thoughts or questions.
- Thank the participant again for their time and explain the next steps (e.g., how their data will be used, when they can expect updates).

**9. Post-Interview Tasks**

- Save and label the recording immediately.
- Complete any notes or observations while the interview is fresh in your memory.
- Store all materials securely, following the study’s data management protocols.

**10. Maintain Professionalism and Ethical Standards**

- Respect participant confidentiality at all times.
- Adhere to the study’s ethical guidelines, including informed consent and data protection.
- Report any concerns or irregularities to the study coordinator promptly.

By following these instructions, you will ensure that the semi-structured interviews are conducted effectively, yielding valuable data for the study.
